# Supplementary material for: Bacillus velezensis YC7010 Enhances Plant Defenses Against Brown Planthopper Through Transcriptomic and Metabolic Changes in Rice
Source: Front Plant Sci. 2018 Dec 21;9:1904. doi: 10.3389/fpls.2018.01904 (PMC6308211; doi:10.3389/fpls.2018.01904)
Supplement: Supplementary file 17 [file Table_4.XLSX]

## Sheet: Sheet1
Table S4. List of upregulated and downregulated differentially expressed genes in all comparisons
		Control_Co-ntrol + BPH	YC7010_YC-7010 + BPH	Control_ YC7010	Control +BPH_ YC7010 + BPH	Normalized counts
DEG	Annotation	log2FC	log2FC	log2FC	log2FC	Control	Control + BPH	YC7010	YC7010 + BPH
LOC_Os12g14440.1	Jacalin-like lectin domain containing protein, putative, expressed	-1.76	3.54	-1.68	3.63	752	222	235	2745
LOC_Os11g32650.1	chalcone synthase, putative, expressed	-1.83	-	1.81	3.02	662	186	2323	1508
LOC_Os06g01250.1	cytochrome P450, putative, expressed	-1.91	-	1.45	2.57	1018	271	2777	1617
LOC_Os12g37260.1	lipoxygenase 2.1, chloroplast precursor, putative, expressed	-	2.87	-0.95	2.5	2430	1634	1260	9229
LOC_Os12g04500.1	response regulator receiver domain containing protein, expressed	-1.67	-	-	2.46	704	221	732	1214
LOC_Os12g37320.1	lipoxygenase 2.2, chloroplast precursor, putative, expressed	-	2.78	-	2.39	249	209	159	1095
LOC_Os12g37350.1	lipozygenase protein, putative, expressed	-	2.7	-	2.38	763	555	444	2894
LOC_Os01g63190.1	laccase precursor protein, putative, expressed	-	-	1.54	2.21	617	384	1796	1775
LOC_Os02g41650.3	phenylalanine ammonia-lyase, putative, expressed	-1.01	-	1.04	2	897	446	1840	1793
LOC_Os05g35290.1	phenylalanine ammonia-lyase, putative, expressed	-	-	1.21	1.83	511	336	1183	1194
LOC_Os12g01530.1	ferritin-1, chloroplast precursor, putative, expressed	-1.17	-	-	1.8	977	433	1704	1505
LOC_Os05g06920.1	relA-SpoT like protein RSH4, putative, expressed	-1.22	-	1.06	1.79	1186	509	2479	1756
LOC_Os11g01530.1	ferritin-1, chloroplast precursor, putative, expressed	-1.16	-	-	1.78	964	431	1660	1477
LOC_Os10g40720.1	expansin precursor, putative, expressed	-	-	1.19	1.72	497	306	1138	1011
LOC_Os07g42960.1	phospho-2-dehydro-3-deoxyheptonate aldolase, chloroplast precursor, putative, expressed	-1.05	-	-	1.7	683	330	1242	1073
LOC_Os07g24190.1	CESA3 - cellulose synthase, expressed	-0.95	-	-	1.67	766	396	1019	1264
LOC_Os07g48040.1	peroxidase precursor, putative, expressed	-1.1	-	-	1.67	1682	786	2042	2492
LOC_Os04g43800.1	phenylalanine ammonia-lyase, putative, expressed	-	-	1.33	1.66	464	372	1166	1170
LOC_Os02g41630.2	phenylalanine ammonia-lyase, putative, expressed	-	-	1.25	1.63	1613	1092	3842	3368
LOC_Os03g53800.3	periplasmic beta-glucosidase precursor, putative, expressed	-1.17	-	-	1.54	968	430	1177	1249
LOC_Os07g49310.1	omega-3 fatty acid desaturase, chloroplast precursor, putative, expressed	-	-	-	1.51	995	678	1866	1932
LOC_Os08g30020.2	membrane protein, putative, expressed	-	-	-	1.46	682	443	1311	1218
LOC_Os01g64960.1	chlorophyll A-B binding protein, putative, expressed	-1.19	-	-	1.44	3244	1423	6355	3868
LOC_Os04g38600.1	glyceraldehyde-3-phosphate dehydrogenase, putative, expressed	-	-	1.04	1.43	9070	4980	18699	13379
LOC_Os04g43760.1	phenylalanine ammonia-lyase, putative, expressed	-	-	-	1.21	1025	753	2024	1744
LOC_Os08g01380.1	2Fe-2S iron-sulfur cluster binding domain containing protein, expressed	-	-	1.06	1.15	5847	3852	12229	8571
LOC_Os02g15750.1	expressed protein	-1.02	-	-	1.14	1148	568	1984	1247
LOC_Os06g06290.1	GDSL-like lipase/acylhydrolase, putative, expressed	-1	-	-	1.13	2187	1094	2126	2396
LOC_Os09g36680.1	ribonuclease T2 family domain containing protein, expressed	-1.85	-	-	1.13	5256	1462	4418	3194
LOC_Os08g06100.1	O-methyltransferase, putative, expressed	-1.48	-	2.06	2.63	227	81	946	501
LOC_Os06g36090.1	ABC-2 type transporter, putative, expressed	-	-	-	1.09	712	664	1128	1416
LOC_Os12g17600.1	ribulose bisphosphate carboxylase small chain, chloroplast precursor, putative, expressed	-	-	-	1.06	79336	47908	137252	99650
LOC_Os09g36450.1	triosephosphate isomerase, chloroplast precursor, putative, expressed	-	-	-	1.04	3088	1659	4890	3408
LOC_Os11g06720.1	abscisic stress-ripening, putative, expressed	-	-	-	1.04	4077	2318	5343	4769
LOC_Os06g09610.1	peroxiredoxin, putative, expressed	-	-	-	1.03	1517	807	2660	1644
LOC_Os02g18450.1	GTP-binding protein typA/bipA, putative, expressed	-	-	-	1.02	1103	864	1994	1746
LOC_Os11g47970.1	AAA-type ATPase family protein, putative, expressed	-	-	1.16	1	15862	13166	35454	26351
LOC_Os05g27730.1	WRKY53, expressed	1.54	-	-	-1.01	574	1665	558	825
LOC_Os04g26870.1	oxidoreductase, aldo/keto reductase family protein, putative, expressed	-	-	-	-1.02	2924	3720	1693	1833
LOC_Os11g39370.1	BRASSINOSTEROID INSENSITIVE 1-associated receptor kinase 1 precursor, putative, expressed	-	-	-1.01	-1.02	1470	1796	728	886
LOC_Os08g43550.1	MYB family transcription factor, putative, expressed	2.03	-	-	-1.07	316	1289	489	612
LOC_Os10g30790.2	inorganic phosphate transporter, putative, expressed	-	-	-	-1.07	866	1454	543	691
LOC_Os02g52730.1	ferredoxin--nitrite reductase, putative, expressed	1.51	-	-	-1.09	522	1490	960	698
LOC_Os01g25484.1	ferredoxin--nitrite reductase, putative, expressed	1.54	-	-	-1.11	621	1804	1130	838
LOC_Os02g13510.1	receptor-like protein kinase 5 precursor, putative, expressed	-	-	-1.2	-1.15	1552	2510	675	1130
LOC_Os11g25780.1	PB1 domain containing protein, expressed	1.15	-	-	-1.15	1255	2789	1166	1256
LOC_Os10g42780.1	lrgB-like family protein, expressed	2.07	-	-	-1.19	482	2029	671	891
LOC_Os03g59430.2	uncharacterized glycosyltransferase, putative, expressed	1.16	-	-	-1.28	636	1421	496	584
LOC_Os07g10840.1	uncharacterized glycosyltransferase, putative, expressed	1.24	-	-	-1.29	2914	6900	1972	2818
LOC_Os11g11960.1	disease resistance protein RPM1, putative, expressed	1.28	-	-	-1.3	618	1496	440	606
LOC_Os10g30770.1	inorganic phosphate transporter, putative, expressed	1.62	-	-	-1.31	424	1300	303	526
LOC_Os11g09010.3	lipase, putative, expressed	2.11	-	-	-1.4	245	1057	208	401
LOC_Os05g28740.1	universal stress protein domain containing protein, putative, expressed	1.03	-	-	-1.42	1308	2676	876	998
LOC_Os03g60080.1	NAC domain-containing protein 67, putative, expressed	1.54	-	-	-1.46	650	1893	708	688
LOC_Os03g05640.1	inorganic phosphate transporter, putative, expressed	2.12	1	-	-1.51	261	1135	200	399
LOC_Os03g05620.1	inorganic phosphate transporter, putative, expressed	2.06	-	-	-1.54	789	3300	600	1132
LOC_Os10g10130.1	OsWAK112d - OsWAK receptor-like protein kinase, expressed	3.08	2.4	-	-1.64	375	3164	192	1016
LOC_Os08g36500.1	nitrate reductase, putative, expressed	2.57	-	-	-1.81	340	2026	518	579
LOC_Os08g36480.1	nitrate reductase, putative, expressed	2.64	-	-	-1.84	333	2076	519	581
LOC_Os01g05650.1	metallothionein, putative, expressed	-1.41	-	-	-	2807	1060	2520	1395
LOC_Os01g18800.1	CAMK_KIN1/SNF1/Nim1_like.9 - CAMK includes calcium/calmodulin depedent protein kinases, expressed	1.49	-	-	-	464	1306	515	694
LOC_Os01g37910.1	vacuolar-processing enzyme precursor, putative, expressed	1.25	-	-	-	876	2078	1128	1724
LOC_Os01g38530.1	ELF3 protein, putative, expressed	1.03	-	-	-	744	1523	737	1265
LOC_Os01g41710.1	chlorophyll A-B binding protein, putative, expressed	2.41	-	1.16	-	537	2847	1204	1908
LOC_Os01g45914.1	expressed protein	-1.16	-	-2.17	-	2986	1340	664	777
LOC_Os01g48930.1	splicing factor-related, putative, expressed	1.06	-	-	-	820	1707	774	1107
LOC_Os01g52240.1	chlorophyll A-B binding protein, putative, expressed	1.98	-	1.59	-	430	1698	1294	1341
LOC_Os01g52250.1	starch synthase, putative, expressed	1.7	-	1.32	-	566	1842	1416	1469
LOC_Os02g12480.1	expressed protein	1.04	-	-	-	2586	5325	2508	3558
LOC_Os02g14440.1	peroxidase precursor, putative, expressed	1.01	-	-	-	2820	5697	3378	3625
LOC_Os02g36340.1	riboflavin biosynthesis protein ribAB, chloroplast precursor, putative, expressed	1.31	-	-	-	950	2356	1196	1826
LOC_Os02g40240.1	receptor kinase, putative, expressed	1.16	1.06	-	-	7878	17650	4760	9890
LOC_Os02g54820.1	trehalose-6-phosphate synthase, putative, expressed	1.74	-	-	-	621	2078	861	1415
LOC_Os03g04770.1	beta-amylase, putative, expressed	-1.24	-1.54	-	-	1430	608	1557	534
LOC_Os03g06630.1	heat stress transcription factor, putative, expressed	1.33	-	-	-	440	1104	620	792
LOC_Os03g20700.2	magnesium-chelatase, putative, expressed	1.26	-	-	-	729	1741	1304	1987
LOC_Os03g23010.1	expressed protein	1.2	-	-	-	1105	2531	788	1297
LOC_Os03g27080.1	calmodulin-binding transcription activator 2, putative, expressed	1.49	1.37	-	-	375	1053	212	546
LOC_Os03g39610.1	chlorophyll A-B binding protein, putative, expressed	1.29	-	1.05	-	475	1160	984	1042
LOC_Os03g50310.1	CCT/B-box zinc finger protein, putative, expressed	1.21	-	-	-	463	1072	408	580
LOC_Os04g31120.3	OsFBK14 - F-box domain and kelch repeat containing protein, expressed	2.3	1.7	-	-	234	1153	307	1001
LOC_Os04g47360.1	OsPOP9 - Putative Prolyl Oligopeptidase homologue, expressed	-1.76	-	-	-	7298	2160	4765	2940
LOC_Os04g49510.1	CAMK_CAMK_like.27 - CAMK includes calcium/calmodulin depedent protein kinases, expressed	1.65	-	-	-	939	2938	944	1731
LOC_Os04g53190.2	CPuORF12 - conserved peptide uORF-containing transcript, expressed	-1.28	-	-	-	2052	848	1849	1411
LOC_Os04g53195.1	expressed protein	-1.26	-	-	-	1572	656	1415	1079
LOC_Os04g58710.1	AMP-binding domain containing protein, expressed	1.31	-	-1.26	-1.85	759	1879	318	520
LOC_Os05g51150.1	RNA polymerase sigma factor, putative, expressed	1.28	-	-	-	439	1066	655	902
LOC_Os05g51420.1	hypersensitive-induced response protein, putative, expressed	1.08	-	-	-	1786	3764	1746	2541
LOC_Os06g09450.2	sucrose synthase, putative, expressed	1.14	-	-	-	1030	2265	1022	1634
LOC_Os06g28050.3	expressed protein	1.02	-	-	-	588	1193	529	899
LOC_Os06g28194.1	expressed protein	1.1	-	-	-	1147	2466	1597	2379
LOC_Os06g47550.1	cadmium/zinc-transporting ATPase, putative, expressed	-1.4	-	-1.07	-	1238	471	588	410
LOC_Os07g47350.1	potassium transporter, putative, expressed	1.15	-	-	-	941	2084	720	1092
LOC_Os08g33820.1	chlorophyll A-B binding protein, putative, expressed	1.37	-	-	-	1472	3804	2783	3522
LOC_Os08g38710.1	uncharacterized glycosyltransferase, putative, expressed	1.51	1.11	-	-	526	1499	542	1168
LOC_Os09g17329.1	expressed protein	1.05	-	-	-	1364	2832	1527	2413
LOC_Os09g17740.1	chlorophyll A-B binding protein, putative, expressed	1.96	-	1.42	-	492	1919	1314	1436
LOC_Os10g18340.1	expressed protein	1.19	-	-	-	582	1327	1065	1346
LOC_Os11g01140.1	AGC_PVPK_like_kin82y.18 - ACG kinases include homologs to PKA, PKG and PKC, expressed	1.41	1.12	-	-	1529	4068	1479	3207
LOC_Os11g06980.1	BURP domain containing protein, expressed	2.41	2.12	-	-	485	2578	504	2187
LOC_Os11g33120.1	respiratory burst oxidase, putative, expressed	1	-	-	-	540	1080	515	861
LOC_Os12g01140.1	AGC_PVPK_like_kin82y.2 - ACG kinases include homologs to PKA, PKG and PKC, expressed	1.41	1.12	-	-	1529	4068	1480	3208
LOC_Os12g36110.1	calmodulin binding protein, putative, expressed	2.62	2.03	-	-1.08	264	1623	188	768
LOC_Os12g42850.1	amino acid permease, putative, expressed	1.02	-	-	-	1663	3368	1492	2258
LOC_Os03g06230.1	galactose mutarotase-like, putative, expressed	-	-1	-	-	1240	822	1870	932
LOC_Os07g34006.1	transporter family protein, putative, expressed	-1.83	-1.02	1.39	2.19	415	117	1085	534
LOC_Os06g18010.1	UDP-glucoronosyl and UDP-glucosyl transferase domain containing protein, expressed	-1.59	-1	1.69	2.28	221	73	716	357
LOC_Os10g01134.1	OsSCP46 - Putative Serine Carboxypeptidase homologue, expressed	-	-1.02	-	-	1380	790	1282	632
LOC_Os05g22840.1	expressed protein	-	-1.06	-	-	4487	3357	4852	2325
LOC_Os07g47640.1	ultraviolet-B-repressible protein, putative, expressed	-	-1.07	-	-	852	621	1640	782
LOC_Os07g48500.1	stress responsive protein, putative, expressed	-	-1.08	-	-	2038	1119	1497	710
LOC_Os03g50080.1	peptidyl-prolyl cis-trans isomerase, FKBP-type, putative, expressed	-	-1.21	-	-	762	395	1077	467
LOC_Os03g21560.1	photosystem II 11 kD protein, putative, expressed	-1.24	-1.28	-	-	800	340	1456	601
LOC_Os01g57968.1	expressed protein	-	-1.32	-	-	42364	34063	52980	21169
LOC_Os07g32570.1	OsAPRL1 adenosine 5\'-phosphosulfate reductase-like OsAPRL1, expressed	-1.23	-1.34	1.23	1.11	504	215	1180	464
LOC_Os04g16770.1	photosynthetic reaction center protein, putative, expressed	-	-1.64	-	-1.17	1763	1924	2656	855
LOC_Os08g35420.1	photosynthetic reaction center protein, putative, expressed	-	-1.64	-	-1.17	1666	1813	2514	804
LOC_Os10g21192.1	photosystem Q, putative, expressed	-	-1.65	-	-1.17	1641	1784	2477	790
LOC_Os12g19580.1	photosynthetic reaction center protein, putative, expressed	-	-1.73	-	-1.2	655	720	1040	314
LOC_Os10g21268.1	ribulose bisphosphate carboxylase large chain precursor, putative, expressed	-1.07	-1.9	1.09	-	733	349	1562	420
LOC_Os06g18670.1	anthocyanidin 3-O-glucosyltransferase, putative, expressed	-2.27	-	1.78	3.24	390	81	1338	765
LOC_Os11g13890.1	chlorophyll A-B binding protein, putative, expressed	-	-	1.52	-	673	700	1930	1192
LOC_Os07g33910.2	transporter family protein, putative, expressed	-1.74	-	1.37	2.21	425	127	1098	586
LOC_Os05g31140.1	glycosyl hydrolases family 17, putative, expressed	-	-	1.25	-	669	830	1597	1329
LOC_Os02g02400.1	catalase isozyme A, putative, expressed	-	-	1.24	-	2416	3096	5724	5100
LOC_Os02g46260.1	OsSCP9 - Putative Serine Carboxypeptidase homologue, expressed	-1.4	-	1.17	1.93	500	190	1124	724
LOC_Os07g37240.1	chlorophyll A-B binding protein, putative, expressed	-	-	1.16	-	3474	2335	7762	4580
LOC_Os04g33830.1	membrane protein, putative, expressed	-	-	1.13	-	765	1172	1679	1681
LOC_Os05g33570.1	pyruvate, phosphate dikinase, chloroplast precursor, putative, expressed	-	-	1.13	-	787	770	1720	1458
LOC_Os12g23150.1	4-nitrophenylphosphatase-like, putative, expressed	-	-	1.13	-	832	840	1817	1624
LOC_Os08g04500.1	terpene synthase, putative, expressed	-1	-	1.08	1.67	518	260	1098	829
LOC_Os04g38410.1	chlorophyll A-B binding protein, putative, expressed	-	-	1.05	-	825	902	1706	1288
LOC_Os05g12640.1	expressed protein	-	-	1.35	1.08	417	364	1064	770
LOC_Os11g47980.1	expressed protein	-	-	1.44	1.09	510	516	1388	1102
