# Supplementary material for: Bacillus velezensis YC7010 Enhances Plant Defenses Against Brown Planthopper Through Transcriptomic and Metabolic Changes in Rice
Source: Front Plant Sci. 2018 Dec 21;9:1904. doi: 10.3389/fpls.2018.01904 (PMC6308211; doi:10.3389/fpls.2018.01904)
Supplement: Supplementary file 18 [file Table_5.XLSX]

## Sheet: Sheet1
Table S5. The DEG assign to MapMan major pathways. U: upregulated DEG (P < 0.01, log2FC ≥1); green D: downregulated DEG (P < 0.01, log2FC ≤ 1).
Pathways	BinCode	BinName	DEG	MSU Annotation	Control_Co-ntrol + BPH	YC7010_YC-7010 + BPH	Control_ YC7010	Control +BPH_ YC7010 + BPH	Control_Co-ntrol + BPH	YC7010_YC-7010 + BPH	Control_ YC7010	Control +BPH_ YC7010 + BPH
secondary metabolism	16.1	secondary metabolism.simple phenols	LOC_Os01g63190.1	laccase precursor protein, putative, expressed	-		U	U			1.54	2.21
	16.1.5	secondary metabolism.isoprenoids.terpenoids	LOC_Os08g04500.1	terpene synthase, putative, expressed	D		U	U	-1		1.08	1.67
	16.2.1.1	secondary metabolism.phenylpropanoids.lignin biosynthesis.PAL	LOC_Os04g43800.1	phenylalanine ammonia-lyase, putative, expressed	-		U	U			1.33	1.66
	16.2.1.1	secondary metabolism.phenylpropanoids.lignin biosynthesis.PAL	LOC_Os02g41650.3	phenylalanine ammonia-lyase, putative, expressed	D		U	U	-1.01		1.04	2
	16.2.1.1	secondary metabolism.phenylpropanoids.lignin biosynthesis.PAL	LOC_Os05g35290.1	phenylalanine ammonia-lyase, putative, expressed	-		U	U			1.21	1.83
	16.2.1.1	secondary metabolism.phenylpropanoids.lignin biosynthesis.PAL	LOC_Os02g41630.2	phenylalanine ammonia-lyase, putative, expressed	-		U	U			1.25	1.63
	16.2.1.1	secondary metabolism.phenylpropanoids.lignin biosynthesis.PAL	LOC_Os04g43760.1	phenylalanine ammonia-lyase, putative, expressed	-			U				1.21
	16.8.2	secondary metabolism.flavonoids.chalcones	LOC_Os11g32650.1	chalcone synthase, putative, expressed	D		U	U	-1.83		1.81	3.02
hormone metabolism.jasmonate	17.7.1.2	hormone metabolism.jasmonate.synthesis-degradation.lipoxygenase	LOC_Os12g37320.1	lipoxygenase 2.2, chloroplast precursor, putative, expressed	-	U		U		2.78		2.39
	17.7.1.2	hormone metabolism.jasmonate.synthesis-degradation.lipoxygenase	LOC_Os12g37350.1	lipozygenase protein, putative, expressed	-	U		U		2.7		2.38
	17.7.1.2	hormone metabolism.jasmonate.synthesis-degradation.lipoxygenase	LOC_Os12g37260.1	lipoxygenase 2.1, chloroplast precursor, putative, expressed	-	U		U		2.87		2.5
hormone metabolism.auxin	17.2.3	hormone metabolism.auxin.induced-regulated-responsive-activated	LOC_Os04g26870.1	oxidoreductase, aldo/keto reductase family protein, putative, expressed	-			D				-1.02
hormone metabolism.ethylene	17.5.3	hormone metabolism.ethylene.induced-regulated-responsive-activated	LOC_Os05g28740.1	universal stress protein domain containing protein, putative, expressed	U			D	1.03			-1.42
stress	20.1	stress.biotic	LOC_Os12g14440.1	Jacalin-like lectin domain containing protein, putative, expressed	D	U	D	U	-1.76	3.54	-1.68	3.63
	20.1	stress.biotic	LOC_Os11g11960.1	disease resistance protein RPM1, putative, expressed	U			D	1.28			-1.3
	20.1	stress.biotic	LOC_Os11g09010.3	lipase, putative, expressed	U			D	2.11			-1.4
	20.1.1	stress.biotic.respiratory burst	LOC_Os11g33120.1	respiratory burst oxidase, putative, expressed	U				1
	20.2.1	stress.abiotic.heat	LOC_Os06g28050.3	expressed protein	U				1.02
	20.2.3	stress.abiotic.drought/salt	LOC_Os05g12640.1	expressed protein			U				1.35
	20.2.3	stress.abiotic.drought/salt	LOC_Os11g06980.1	BURP domain containing protein, expressed	U	U			2.41	2.12
signalling	30.2.11	signalling.receptor kinases.leucine rich repeat XI	LOC_Os02g40240.1	leucine-rich repeat receptor protein kinase EXS precursor, putative, expressed	U	U			1.16	1.06
	30.2.11	signalling.receptor kinases.leucine rich repeat XI	LOC_Os02g13510.1	receptor-like protein kinase 5 precursor, putative, expressed	-		D	D			-1.2	-1.15
	30.2.22	signalling.receptor kinases.proline extensin like	LOC_Os11g39370.1	BRASSINOSTEROID INSENSITIVE 1-associated receptor kinase 1 precursor, putative, expressed	-		D	D			-1.01	-1.02
	30.3	signalling.calcium	LOC_Os12g36110.1	calmodulin binding protein, putative, expressed	U	U		D	2.62	2.03		-1.08
	30.3	signalling.calcium	LOC_Os05g06920.1	relA-SpoT like protein RSH4, putative, expressed	D		U	U	-1.22		1.06	1.79
	30.3	signalling.calcium	LOC_Os04g49510.1	CAMK_CAMK_like.27 - CAMK includes calcium/calmodulin depedent protein kinases, expressed	U				1.65
Photosynthesis	1.1.1.1	PS.lightreaction.photosystem II.LHC-II	LOC_Os08g33820.1	chlorophyll A-B binding protein, putative, expressed	U				1.37
	1.1.1.1	PS.lightreaction.photosystem II.LHC-II	LOC_Os03g39610.1	chlorophyll A-B binding protein, putative, expressed	U				1.29
	1.1.1.1	PS.lightreaction.photosystem II.LHC-II	LOC_Os01g41710.1	chlorophyll A-B binding protein, putative, expressed	U		U		2.24		1.16
	1.1.1.1	PS.lightreaction.photosystem II.LHC-II	LOC_Os09g17740.1	chlorophyll A-B binding protein, putative, expressed	U	-	U		1.96		1.42
	1.1.1.1	PS.lightreaction.photosystem II.LHC-II	LOC_Os01g52240.1	chlorophyll A-B binding protein, putative, expressed	U	-	U		1.98		1.59
	1.1.1.1	PS.lightreaction.photosystem II.LHC-II	LOC_Os11g13890.1	chlorophyll A-B binding protein, putative, expressed	-		U				1.52
	1.1.1.1	PS.lightreaction.photosystem II.LHC-II	LOC_Os04g38410.1	chlorophyll A-B binding protein, putative, expressed	-		U				1.05
	1.1.1.1	PS.lightreaction.photosystem II.LHC-II	LOC_Os07g37240.1	chlorophyll A-B binding protein, putative, expressed	-		U				1.16
	1.1.1.2	PS.lightreaction.photosystem II.PSII polypeptide subunits	LOC_Os01g64960.1	chlorophyll A-B binding protein, putative, expressed	D			U	-1.19			1.44
	1.1.1.2	PS.lightreaction.photosystem II.PSII polypeptide subunits	LOC_Os03g21560.1	photosystem II 11 kD protein, putative, expressed	D	D			-1.23	-1.28
	1.1.1.2	PS.lightreaction.photosystem II.PSII polypeptide subunits	LOC_Os10g21192.1	photosystem Q, putative, expressed	-	D		D		-1.65		-1.65
	1.1.1.2	PS.lightreaction.photosystem II.PSII polypeptide subunits	LOC_Os10g39880.1		-	D				-1.71
	1.1.1.2	PS.lightreaction.photosystem II.PSII polypeptide subunits	LOC_Os08g35420.1	photosynthetic reaction center protein, putative, expressed	-	D		D		-1.64		-1.17
	1.1.1.2	PS.lightreaction.photosystem II.PSII polypeptide subunits	LOC_Os04g16770.1	photosynthetic reaction center protein, putative, expressed	-	D		D		-1.64		-1.17
	1.1.1.2	PS.lightreaction.photosystem II.PSII polypeptide subunits	LOC_Os12g19580.1	photosynthetic reaction center protein, putative, expressed	-	D		D		-1.73		-1.2
	1.1.2.2	PS.lightreaction.photosystem I.PSI polypeptide subunits	LOC_Os04g33830.1	membrane protein, putative, expressed	-	-	U				1.13
	1.1.5.2	PS.lightreaction.other electron carrier (ox/red).ferredoxin	LOC_Os08g01380.1	2Fe-2S iron-sulfur cluster binding domain containing protein, expressed	-		U	U			1.06	1.15
	1.2.1	PS.photorespiration.phosphoglycolate phosphatase	LOC_Os12g23150.1	4-nitrophenylphosphatase-like, putative, expressed	-	-	U				1.13
	1.3.1	PS.calvin cycle.rubisco large subunit	LOC_Os10g21268.1	ribulose bisphosphate carboxylase large chain precursor, putative, expressed	D	D	U		-1.07	-1.9	1.09
	1.3.2	PS.calvin cycle.rubisco small subunit	LOC_Os12g17600.1	ribulose bisphosphate carboxylase small chain, chloroplast precursor, putative, expressed	-			U				1.06
	1.3.4	PS.calvin cycle.GAP	LOC_Os04g38600.1	glyceraldehyde-3-phosphate dehydrogenase, putative, expressed	-		U	U			1.04	1.43
	1.3.5	PS.calvin cycle.TPI	LOC_Os09g36450.1	triosephosphate isomerase, chloroplast precursor, putative, expressed	-			U				1.04
	1.3.13	PS.calvin cycle.rubisco interacting	LOC_Os11g47980.1	expressed protein			U	U			1.44	1.09
	1.3.13	PS.calvin cycle.rubisco interacting	LOC_Os11g47970.1	AAA-type ATPase family protein, putative, expressed	-		U	U			1.16	1
cell wall	10.2.1	cell wall.cellulose synthesis.cellulose synthase	LOC_Os07g24190.1	CESA3 - cellulose synthase, expressed	-			U				1.67
	10.6.1	cell wall.degradation.cellulases and beta -1,4-glucanases	LOC_Os03g53800.3	periplasmic beta-glucosidase precursor, putative, expressed	D			U	-1.17			1.54
	10.7	cell wall.modification	LOC_Os10g40720.1	expansin precursor, putative, expressed	-		U	U			1.19	1.72
misc	26.1	misc.cytochrome P450	LOC_Os06g01250.1	cytochrome P450, putative, expressed	D		U	U	-1.91		1.45	2.53
	26.2	misc.UDP glucosyl and glucoronyl transferases	LOC_Os06g18670.1	anthocyanidin 3-O-glucosyltransferase, putative, expressed	D		U	U	-2.27		1.78	3.24
	26.2	misc.UDP glucosyl and glucoronyl transferases	LOC_Os06g18010.1	UDP-glucoronosyl and UDP-glucosyl transferase domain containing protein, expressed	D	D	U	U	-1.59	-1	1.69	2.28
	26.4.1	misc.beta 1,3 glucan hydrolases.glucan endo-1,3-beta-glucosidase	LOC_Os05g31140.1	glycosyl hydrolases family 17, putative, expressed	-		U				1.25
	26.6	misc.O-methyl transferases	LOC_Os08g06100.1	O-methyltransferase, putative, expressed	D		U	U	-1.48		2.06	2.63
	26.7	misc.oxidases - copper, flavone etc.	LOC_Os04g53190.2	CPuORF12 - conserved peptide uORF-containing transcript, expressed	D				-1.28
	26.7	misc.oxidases - copper, flavone etc.	LOC_Os04g53195.1	expressed protein	D				-1.26
	26.12	misc.peroxidases	LOC_Os02g14440.1	peroxidase precursor, putative, expressed	U				1.01
	26.12	misc.peroxidases	LOC_Os07g48040.1	peroxidase precursor, putative, expressed	D			U	-1.1			1.67
	26.23	misc.rhodanese	LOC_Os02g15750.1	expressed protein	D			U	-1.02			1.14
	26.28	misc.GDSL-motif lipase	LOC_Os06g06290.1	GDSL-like lipase/acylhydrolase, putative, expressed	D			U	-1			1.13
major CHO metabolism.synthesis	2.1.2.2	major CHO metabolism.synthesis.starch.starch synthase	LOC_Os01g52250.1	starch synthase, putative, expressed	U		U		1.7		1.32
major CHO metabolism.degradation	2.2.1.5	major CHO metabolism.degradation.sucrose.Susy	LOC_Os06g09450.2	sucrose synthase, putative, expressed	U				1.14
	2.2.2.1.2	major CHO metabolism.degradation.starch.starch cleavage.beta amylase	LOC_Os03g04770.1	beta-amylase, putative, expressed	D	D			-1.24	-1.54
minor CHO metabolism.degradation	3.1.2.2	minor CHO metabolism.raffinose family.raffinose synthases.putative	LOC_Os03g59430.2	uncharacterized glycosyltransferase, putative, expressed	U			D	1.16			-1.28
	3.1.2.2	minor CHO metabolism.raffinose family.raffinose synthases.putative	LOC_Os07g10840.1	uncharacterized glycosyltransferase, putative, expressed	U			D	1.24			-1.29
	3.1.2.2	minor CHO metabolism.raffinose family.raffinose synthases.putative	LOC_Os08g38710.1	uncharacterized glycosyltransferase, putative, expressed	U	U			1.51	1.11
	3.2.1	minor CHO metabolism.trehalose.TPS	LOC_Os02g54820.1	trehalose-6-phosphate synthase, putative, expressed	U				1.74
nucleotide metabolism	23.2	nucleotide metabolism.degradation	LOC_Os07g37230.1				U				1.21
lipid metabolism	11.1.8	lipid metabolism.FA synthesis and FA elongation.acyl coa ligase	LOC_Os04g58710.1	AMP-binding domain containing protein, expressed	U		D	D	1.31		-1.26	-1.85
	11.2.3	lipid metabolism.FA desaturation.omega 3 desaturase	LOC_Os07g49310.1	omega-3 fatty acid desaturase, chloroplast precursor, putative, expressed	-			U				1.51
amino acid metabolism	13.1.6.1.1	amino acid metabolism.synthesis.aromatic aa.chorismate.3-deoxy-D-arabino-heptulosonate 7-phosphate synthase	LOC_Os07g42960.1	phospho-2-dehydro-3-deoxyheptonate aldolase, chloroplast precursor, putative, expressed	D	-	-	U	-1.05			1.7
	13.2.6.2	amino acid metabolism.degradation.aromatic aa.tyrosine	LOC_Os02g20360.1	tyrosine aminotransferase, putative, expressed	-		D				-1.02
Co-factor and vitamine metabolism	18.3.1	Co-factor and vitamine metabolism.riboflavin.GTP cyclohydrolase II	LOC_Os02g36340.1	riboflavin biosynthesis protein ribAB, chloroplast precursor, putative, expressed	U				1.31
N-metabolism	12.1.1	N-metabolism.nitrate metabolism.NR	LOC_Os08g36480.1	nitrate reductase, putative, expressed	U			D	2.64			-1.84
	12.1.1	N-metabolism.nitrate metabolism.NR	LOC_Os08g36500.1	nitrate reductase, putative, expressed	U			D	2.57			-1.81
	12.1.2	N-metabolism.nitrate metabolism.nitrite reductase	LOC_Os02g52730.1	ferredoxin--nitrite reductase, putative, expressed	U			D	1.51			-1.09
	12.1.2	N-metabolism.nitrate metabolism.nitrite reductase	LOC_Os01g25484.1	ferredoxin--nitrite reductase, putative	U			D	1.54			-1.11
S-assimilation	14.2	S-assimilation.APR	LOC_Os07g32570.1	OsAPRL1 adenosine 5\'-phosphosulfate reductase-like OsAPRL1, expressed	D	D	U	U	-1.23	-1.34	1.23	1.11
glycolysis	4.2.2	glycolysis.plastid branch.phosphoglucomutase (PGM)	LOC_Os06g28194.1	expressed protein	U				1.1
gluconeogenese/ glyoxylate cycle	6.5	gluconeogenese/ glyoxylate cycle.pyruvate dikinase	LOC_Os05g33570.1	pyruvate, phosphate dikinase, chloroplast precursor, putative, expressed	-	-	U				1.13
metal handling	15.2	metal handling.binding, chelation and storage	LOC_Os01g05650.1	metallothionein, putative, expressed	D				-1.41
	15.2	metal handling.binding, chelation and storage	LOC_Os12g01530.1	ferritin-1, chloroplast precursor, putative, expressed	D			U	-1.17			1.8
	15.2	metal handling.binding, chelation and storage	LOC_Os11g01530.1	ferritin-1, chloroplast precursor, putative, expressed	D			U	-1.16			1.78
cell.organisation	31.1	cell.organisation	LOC_Os09g17329.1	expressed protein	U				1.05
tetrapyrrole synthesis	19.1	tetrapyrrole synthesis.magnesium chelatase	LOC_Os03g20700.2	magnesium-chelatase, putative, expressed	U				1.26
	19.1	tetrapyrrole synthesis.magnesium chelatase	LOC_Os07g46310.1		U				1.26
redox	21.6	redox.dismutases and catalases	LOC_Os02g02400.1	catalase isozyme A, putative, expressed	-		U				1.24
	21.5	redox.peroxiredoxin	LOC_Os06g09610.1	peroxiredoxin, putative, expressed				U				1.03
development	33.99	development.unspecified	LOC_Os03g60080.1	NAC domain-containing protein 67, putative, expressed	U			D	1.54			-1.46
RNA	27.1.19	RNA.processing.ribonucleases	LOC_Os09g36680.1	ribonuclease T2 family domain containing protein, expressed	D			U	-1.85			1.13
	27.2	RNA.transcription	LOC_Os05g51150.1	RNA polymerase sigma factor, putative, expressed	U				1.28
	27.3.5	RNA.regulation of transcription.ARR	LOC_Os12g04500.1	response regulator receiver domain	D			U	-1.67			2.46
	27.3.7	RNA.regulation of transcription.C2C2(Zn) CO-like, Constans-like zinc finger family	LOC_Os03g50310.1	CCT/B-box zinc finger protein, putative, expressed	U				1.21
	27.3.23	RNA.regulation of transcription.HSF,Heat-shock transcription factor family	LOC_Os03g06630.1	heat stress transcription factor, putative, expressed	U				1.33
	27.3.25	RNA.regulation of transcription.MYB domain transcription factor family	LOC_Os08g43550.1	MYB family transcription factor, putative, expressed	U			D	2.03			-1.07
	27.3.32	RNA.regulation of transcription.WRKY domain transcription factor family	LOC_Os05g27730.1	WRKY53, expressed	U			D	1.54			-1.01
	27.3.39	RNA.regulation of transcription.AtSR Transcription Factor family	LOC_Os03g27080.1	calmodulin-binding transcription activator 2, putative, expressed	U	U			1.49	1.36
	27.3.47	RNA.regulation of transcription.ELF3	LOC_Os01g38530.1	ELF3 protein, putative, expressed	U				1.03
protein	29.2.4	protein.synthesis.elongation	LOC_Os02g18450.1	GTP-binding protein typA/bipA, putative, expressed	-			U				1.02
	29.4	protein.postranslational modification	LOC_Os11g25780.1	PB1 domain containing protein, expressed	U			D	1.15			-1.15
	29.4	protein.postranslational modification	LOC_Os12g01140.1	AGC_PVPK_like_kin82y.2 - ACG kinases include homologs to PKA, PKG and PKC, expressed	U	U			1.41	1.12
	29.4	protein.postranslational modification	LOC_Os11g01140.1	AGC_PVPK_like_kin82y.18 - ACG kinases include homologs to PKA, PKG and PKC, expressed	U	U			1.41	1.12
	29.4	protein.postranslational modification	LOC_Os01g18800.1	CAMK_KIN1/SNF1/Nim1_like.9 - CAMK includes calcium/calmodulin depedent protein kinases, expressed	U				1.49
	29.4.1.57	protein.postranslational modification.kinase.receptor like cytoplasmatic kinase VII	LOC_Os10g10130.1	OsWAK112d - OsWAK receptor-like protein kinase, expressed	U	U		D	3.08	2.4		-1.64
	29.5	protein.degradation	LOC_Os01g37910.1	vacuolar-processing enzyme precursor, putative, expressed	U				1.25
	29.5	protein.degradation	LOC_Os04g47360.1	OsPOP9 - Putative Prolyl Oligopeptidase homologue, expressed	D				-1.75
	29.5.5	protein.degradation.serine protease	LOC_Os10g01134.1	OsSCP46 - Putative Serine Carboxypeptidase homologue, expressed	-	D				-1.02
	29.5.5	protein.degradation.serine protease	LOC_Os02g46260.1	OsSCP9 - Putative Serine Carboxypeptidase homologue, expressed	D		U	U	-1.4		1.17	1.93
	29.5.11.1	protein.degradation.ubiquitin.ubiquitin	LOC_Os01g48930.1	splicing factor-related, putative, expressed	U				1.06
	29.5.11.4.3.2	protein.degradation.ubiquitin.E3.SCF.FBOX	LOC_Os04g31120.3	OsFBK14 - F-box domain and kelch repeat containing protein, expressed	U	U			2.3	1.7
	29.6	protein.folding	LOC_Os03g50080.1	peptidyl-prolyl cis-trans isomerase, FKBP-type, putative, expressed	-	D				-1.21
transport	34.3	transport.amino acids	LOC_Os12g42850.1	amino acid permease, putative, expressed	U				1.02
	34.7	transport.phosphate	LOC_Os10g30790.2	inorganic phosphate transporter, putative, expressed	-			D				-1.07
	34.7	transport.phosphate	LOC_Os10g30770.1	inorganic phosphate transporter, putative, expressed	U			D	1.62			-1.31
	34.7	transport.phosphate	LOC_Os03g05620.1	inorganic phosphate transporter, putative, expressed	U			D	2.06			-1.54
	34.7	transport.phosphate	LOC_Os03g05640.1	inorganic phosphate transporter, putative, expressed	U	U		D	2.12	1		-1.51
	34.8	transport.metabolite transporters at the envelope membrane	LOC_Os07g34006.1	transporter family protein, putative, expressed	D	D	U	U	-1.83	-1.02	1.39	2.19
	34.8	transport.metabolite transporters at the envelope membrane	LOC_Os07g33910.2	transporter family protein, putative, expressed	D		U	U	-1.74		1.37	2.21
	34.12	transport.metal	LOC_Os06g47550.1	cadmium/zinc-transporting ATPase, putative, expressed	D		D		-1.4		-1.07
	34.15	transport.potassium	LOC_Os07g47350.1	potassium transporter, putative, expressed	U				1.15
	34.16	transport.ABC transporters and multidrug resistance systems	LOC_Os06g36090.1	ABC-2 type transporter, putative, expressed	-			U				1.09
